# Supplementary material for: Prevalence and risk of antibiotic self-medication and unexpected determinants among patients admitted to the emergency department in a resource-limited setting: a cross-sectional study
Source: Research Square preprint supplement (doi:10.21203/rs.3.rs-6765401/v1), 2025-08-11
Supplement: Supplementary file 1 [file 9e072d9f8e39bb22a0ef894b.docx]

**TABLES**

**Table 1: Sociodemographic characteristics of respondents**

| **Variable** | **Sub-Category** | **Frequency** | **Percentage** |
| --- | --- | --- | --- |
| **Age** | 18-24 | 75 | 10.9% |
|  | 25-34 | 137 | 20.0% |
|  | 35-44 | 279 | 40.7% |
|  | 45-54 | 122 | 17.8% |
|  | 55-64 | 42 | 6.1% |
|  | 65 and over | 31 | 4.5% |
| **Sex** | Female | 441 | 64.3% |
|  | Male | 245 | 35.7% |
| **Education Level** | None | 40 | 5.8% |
|  | Primary | 96 | 14.0% |
|  | Secondary | 445 | 64.9% |
|  | Superior | 105 | 15.3% |
| **Marital Status** | Bachelor | 135 | 19.7% |
|  | Bride | 452 | 65.9% |
|  | Divorcee | 51 | 7.4% |
|  | Widower | 48 | 7.0% |
| **Occupation** | Employee | 175 | 25.5% |
|  | Other | 26 | 3.8% |
|  | Self-employed | 373 | 54.4% |
|  | Student | 28 | 4.1% |
|  | Unemployed | 84 | 12.2% |
| **Monthly Income (ME)** | Less than 100,000 | 57 | 8.3% |
|  | 100,000 - 200,000 | 97 | 14.1% |
|  | 200,001 - 300,000 | 134 | 19.5% |
|  | 300,001 - 400,000 | 112 | 16.3% |
|  | 400,001 - 500,000 | 84 | 12.2% |
|  | More than 500,000 | 92 | 13.4% |
|  | Prefer not to answer | 110 | 16.0% |
| **Distance between health facility and home** | | | |
|  | Less than 1 km | 419 | 61,1% |
|  | 1 – 3 km | 191 | 27,8% |
|  | 4 – 5 km | 56 | 8,2% |
|  | More than 5 km | 20 | 2,9% |
| **Have health insurance** | | | |
|  | No | 482 | 70,3% |
|  | Yes | 204 | 29,7% |

**Table 2: Bivariate correlation (Chi-square distribution) between factors and risk of antibacterial self-medication**

| **Variables** | **Categories** | **Antibacterial self-medication** | | | | **X2** | **p-value** |
| --- | --- | --- | --- | --- | --- | --- | --- |
|  |  | **No** | | **Yes** | |  |  |
|  |  | **Frequency**  **n=153** | **Percentage (22.3%)** | **Frequency**  **n=533** | **Percentage (77.7%)** |  |  |
| **Age** | 18-24 | 29 | 4.2% | 46 | 6.7% | 25.4 | < .001 |
|  | 25-34 | 36 | 5.2% | 101 | 14.7% |  |  |
|  | 35-44 | 53 | 7.7% | 226 | 32.9% |  |  |
|  | 45-54 | 30 | 4.4% | 92 | 13.4% |  |  |
|  | 55-64 | 4 | 0.6% | 38 | 5.5% |  |  |
|  | 65 and over | 1 | 0.1% | 30 | 4.4% |  |  |
| Sex | Female | 94 | 13.7% | 347 | 50.6% | 0.7 | 0.404 |
|  | Male | 59 | 8.6% | 186 | 27.1% |  |  |
| Education Level | None | 8 | 1.2% | 32 | 4.7% | 7.70 | 0.053 |
|  | Primary | 15 | 2.2% | 81 | 11.8% |  |  |
|  | Secondary | 97 | 14.1% | 348 | 50.7% |  |  |
|  | Superior | 33 | 4.8% | 72 | 10.5% |  |  |
| Marital Status | Bachelor | 46 | 6.7% | 89 | 13.0% | 18.5 | < 0.001 |
|  | Bride | 84 | 12.2% | 368 | 53.6% |  |  |
|  | Divorcee | 16 | 2.3% | 35 | 5.1% |  |  |
|  | Widower | 7 | 1.0% | 41 | 6.0% |  |  |
| Occupation | Employee | 45 | 6.6% | 130 | 19.0% | 17.1 | 0.002 |
|  | Other | 0 | 0.0% | 26 | 3.8% |  |  |
|  | Self-employed | 72 | 10.5% | 301 | 43.9% |  |  |
|  | Student | 8 | 1.2% | 20 | 2.9% |  |  |
|  | Unemployed | 28 | 4.1% | 56 | 8.2% |  |  |
| Monthly Income (ME) | Less than 100,000 | 9 | 1.3% | 48 | 7.0% | 29.0 | < 0.001 |
|  | 100,000 - 200,000 | 22 | 3.2% | 75 | 10.9% |  |  |
|  | 200,001 - 300,000 | 20 | 2.9% | 114 | 16.6% |  |  |
|  | 300,001 - 400,000 | 24 | 3.5% | 88 | 12.8% |  |  |
|  | 400,001 - 500,000 | 15 | 2.2% | 69 | 10.1% |  |  |
|  | More than 500,000 | 18 | 2.6% | 74 | 10.8% |  |  |
|  | Prefer not to answer | 45 | 6.6% | 65 | 9.5% |  |  |
| **Distance between health facility and home** | | | | | | | |
|  | Less than 1 km | 81 | 11,8% | 338 | 49,3% | 9,2 | 0,027 |
|  | 1 – 3 km | 55 | 8,0% | 136 | 19,8% |  |  |
|  | 4 – 5 km | 15 | 2,2% | 41 | 6,0% |  |  |
|  | More than 5 km | 2 | 0,3% | 18 | 2,6% |  |  |
| **Have health insurance** |  |  |  |  |  |  |  |
|  | No | 105 | 15,3% | 377 | 55,0% | 0,25 | 0,616 |
|  | Yes | 48 | 7,0% | 156 | 22,7% |  |  |
|  |  |  |  |  |  |  |  |

**Table 3: Binary logistic regression of factors associated with risk of antibacterial self-medication**

|  | | | | | | | | | | | | | | | |
| --- | --- | --- | --- | --- | --- | --- | --- | --- | --- | --- | --- | --- | --- | --- | --- |
|  | | | | | | | | | | | | **95% Confidence Interval** | | | |
| **Predictor** | | **Estimate** | | **SE** | | **Z** | | **p** | | **Odds ratio** | | **Lower** | | **Upper** | |
| Intercept |  | 0.24390 |  | 0.421 |  | 0.5799 |  | 0.562 |  | 1.276 |  | 0.560 |  | 2.91 |  |
| Age (years) |  |  |  |  |  |  |  |  |  |  |  |  |  |  |  |
| 18-24 |  | Ref |  | Ref |  | Ref |  | Ref |  | Ref |  | Ref |  | Ref |  |
| 25-34 |  | 0.44272 |  | 0.362 |  | 1.2217 |  | 0.222 |  | 1.557 |  | 0.765 |  | 3.17 |  |
| 35-44 |  | 0.80546 |  | 0.426 |  | 1.8918 |  | 0.059 |  | 2.238 |  | 0.971 |  | 5.15 |  |
| 45-54 |  | 0.53307 |  | 0.468 |  | 1.1402 |  | 0.254 |  | 1.704 |  | 0.682 |  | 4.26 |  |
| 55-64 |  | 1.94327 |  | 0.701 |  | 2.7721 |  | 0.006 |  | 6.982 |  | 1.767 |  | 27.58 |  |
| 65 and over |  | 3.76942 |  | 1.208 |  | 3.1197 |  | 0.002 |  | 43.355 |  | 4.060 |  | 462.91 |  |
| Marital Status: |  |  |  |  |  |  |  |  |  |  |  |  |  |  |  |
| Bachelor |  | Ref |  | Ref |  | Ref |  | Ref |  | Ref |  | Ref |  | Ref |  |
| Bride) |  | 0.18522 |  | 0.337 |  | 0.5490 |  | 0.583 |  | 1.203 |  | 0.621 |  | 2.33 |  |
| Divorcee |  | -0.78557 |  | 0.476 |  | -1.6497 |  | 0.099 |  | 0.456 |  | 0.179 |  | 1.16 |  |
| Widower |  | -0.70974 |  | 0.632 |  | -1.1227 |  | 0.262 |  | 0.492 |  | 0.142 |  | 1.70 |  |
| Occupation |  |  |  |  |  |  |  |  |  |  |  |  |  |  |  |
| Employee |  | Ref |  | Ref |  | Ref |  | Ref |  | Ref |  | Ref |  | Ref |  |
| Self-employed worker |  | 0.32211 |  | 0.242 |  | 1.3285 |  | 0.184 |  | 1.380 |  | 0.858 |  | 2.22 |  |
| Student) |  | 0.56023 |  | 0.587 |  | 0.9538 |  | 0.340 |  | 1.751 |  | 0.554 |  | 5.54 |  |
| Unemployed |  | 0.00626 |  | 0.415 |  | 0.0151 |  | 0.988 |  | 1.006 |  | 0.447 |  | 2.27 |  |
| Monthly Income (ME) |  |  |  |  |  |  |  |  |  |  |  |  |  |  |  |
| 100,000 - 200,000 |  | Ref |  | Ref |  | Ref |  | Ref |  | Ref |  | Ref |  | Ref |  |
| 200,001 - 300,000 |  | 0.42058 |  | 0.359 |  | 1.1719 |  | 0.241 |  | 1.523 |  | 0.754 |  | 3.08 |  |
| 300,001 - 400,000 |  | -0.13309 |  | 0.354 |  | -0.3755 |  | 0.707 |  | 0.875 |  | 0.437 |  | 1.75 |  |
| 400,001 - 500,000 |  | 0.36907 |  | 0.401 |  | 0.9193 |  | 0.358 |  | 1.446 |  | 0.659 |  | 3.18 |  |
| Less than 100,000 |  | 0.82150 |  | 0.525 |  | 1.5662 |  | 0.117 |  | 2.274 |  | 0.813 |  | 6.36 |  |
| More than 500,000 |  | 0.25985 |  | 0.391 |  | 0.6651 |  | 0.506 |  | 1.297 |  | 0.603 |  | 2.79 |  |
| Prefer not to answer |  | -0.67576 |  | 0.394 |  | -1.7169 |  | 0.086 |  | 0.509 |  | 0.235 |  | 1.10 |  |
|  |  |  |  |  |  |  |  |  |  |  |  |  |  |  |  |
|  | | | | | | | | | | | | | | | |
|  | | | | | | | | | | | | | | | |
